22           **ABSTRACT (250 max.)**

23           Improved taxonomic methods are needed to quantify declining populations of insect  
24 pollinators. This study devises a high-throughput DNA barcoding protocol for a regional fauna  
25 (United Kingdom) of bees (Apiformes), consisting of reference library construction, a proof-of-  
26 concept monitoring scheme, and the deep barcoding of individuals to assess potential artefacts and  
27 organismal associations. A reference database of Cytochrome Oxidase subunit 1 (*cox1*) sequences  
28 including 92.4% of 278 bee species known from the UK showed high congruence with morphological  
29 taxon concepts, but molecular species delimitations resulted in numerous split and (fewer) lumped  
30 entities within the Linnaean species. Double tagging permitted deep Illumina sequencing of 762  
31 separate individuals of bees from a UK-wide survey. Extracting the target barcode from the amplicon  
32 mix required a new protocol employing read abundance and phylogenetic position, which revealed  
33 180 molecular entities of Apiformes identifiable to species. An additional 72 entities were ascribed to  
34 mitochondrial pseudogenes based on patterns of read abundance and phylogenetic relatedness to  
35 the reference set. Clustering of reads revealed a range of secondary Operational Taxonomic Units  
36 (OTUs) in almost all samples, resulting from traces of insect species caught in the same traps,  
37 organisms associated with the insects including a known mite parasite of bees, and the common  
38 detection of human DNA, besides evidence for low-level cross-contamination in pan traps and  
39 laboratory steps. Custom scripts were generated to conduct critical steps of the bioinformatics  
40 protocol. The resources built here will greatly aid DNA-based monitoring to inform management and  
41 conservation policies for the protection of pollinators.

42 Key words: Pollinators, community barcoding, contamination, Illumina sequencing, double dual  
43 tagging.

44

45

46           **INTRODUCTION**

47           Widespread declines in pollinator populations are raising the alarm about the future of global  
48 biodiversity and agricultural productivity (Garibaldi *et al.* 2013; Hallmann *et al.* 2017; Lever *et al.*  
49 2014), driven by the combined effects of habitat loss, introduction of non-native and invasive  
50 species, pathogens and parasites, and various other factors contributing to environmental change  
51 (Vanbergen *et al.* 2013). Landscape effects on pollination of crops through agricultural  
52 intensification, particularly those of monoculture crops, have led to significant changes in pollinator  
53 communities (Kennedy *et al.* 2013; Ricketts *et al.* 2008), with obvious economic implications for the  
54 agricultural sector and pollination services worth hundreds of millions of pounds in the United  
55 Kingdom alone (Potts *et al.* 2010). However, these trends in species distribution and abundance are  
56 difficult to quantify, unless solid methodologies for monitoring at regional levels can be  
57 implemented. Thus there is an urgent need to develop strategies for large-scale and long-term  
58 systematic monitoring of pollinator populations, to better understand the impacts of declines on  
59 pollination services to crops and wild plants, and inform policy decisions and conservation efforts.

60           Current evidence of change in pollinator populations in the United Kingdom comes primarily  
61 from analyses of records of species occurrence submitted by volunteer recorders (e.g. (Biesmeijer *et*  
62 *al.* 2006). While these allow for the analysis of large-scale changes in species distributions, they  
63 provide no information on abundance or local population size, and are known to be temporally and  
64 spatially biased (Isaac & Pocock 2015). Instead, pan traps have been proposed as the most effective  
65 method for systematic monitoring of bee diversity in European agricultural and grassland habitats  
66 (Westphal *et al.* 2008). Species identification is usually performed with morphological analysis by  
67 expert taxonomists, but there is a growing need for alternative methods, in particular because the  
68 great species diversity and large quantity of specimens from mass trapping make them challenging  
69 and costly to identify (Lebuhn *et al.* 2013).

70 This study applies high throughput sequencing (HTS) techniques to assess bee diversity and  
71 abundance from mass-trapped samples, using a rapid DNA barcoding approach suitable to  
72 individually assay the thousands of specimens potentially generated in the course of a large-scale  
73 monitoring scheme. The first step in this process was the generation of a well curated reference  
74 database that links each DNA sequence to a species name, using the Cytochrome *c* Oxidase subunit I  
75 (*cox1*) barcode marker (Hebert *et al.* 2003), which provides good species discrimination in  
76 Hymenoptera (Smith *et al.* 2008). The more recent approach of ‘metabarcoding’, by which entire trap  
77 catches are subjected to amplicon sequencing in bulk, produces species incidence data based on the  
78 mixed sequence read profile (Yoccoz *et al.* 2012). Current HTS protocols can maintain the individual  
79 information of thousands of samples using unique tags in the initial PCR prior to pooling for Illumina  
80 sequencing with secondary tags, which allows sequences to be traced back to the associated  
81 specimen (Arribas *et al.* 2016; Shokralla *et al.* 2015). The great sequencing depth of this high-  
82 throughput barcoding (HT barcoding) methodology may also reveal DNA from organisms internally or  
83 externally associated with a target specimen or as a carry-over from other specimens in the trap.

84 The current study on the regional-scale pollinator fauna, focused on the bees (Hymenoptera:  
85 Apiformes) of the United Kingdom, illustrates the required steps from generating a barcode  
86 reference database for the 278 species of bees known from the UK, which was then used for the  
87 identification of samples gathered as part of a pilot study for a national monitoring scheme based on  
88 short barcode sequences obtained with HTS. Agreement between morphological and molecular  
89 identifications was assessed. In addition, the deep-sequencing approach allowed the assessment of  
90 organisms associated with the target specimens, as well as cross-contaminations from other species  
91 present in the traps or from specimen handling and laboratory procedures.

92

93

94           **MATERIALS AND METHODS**

95   **Building a regional reference database**

96           A *cox1* reference database was generated from DNA barcoding of specimens of bee species  
97 known to occur in the UK according to the list of Falk and Lewington (2015) and notes from various  
98 sources maintained by co-author DGN. Most specimens were caught by hand netting and identified  
99 by DGN, using the latest keys available at the time (Amiet *et al.* 2001, 2004, 2010; Amiet *et al.* 2007;  
100 Amiet *et al.* 2014; Bogusch & Straka 2012; Falk & Lewington 2015) (Benton 2006; Mueller 2016).  
101 Identifications had to draw on these various references because the comprehensive key of Falk &  
102 Lewington (2015) became available only part way through the study, while some identifications were  
103 also cross-checked between different publications. Specimen data for morphological vouchers are  
104 available at the Natural History Museum Data Portal ([data.nhm.ac.uk](http://data.nhm.ac.uk))  
105 <http://dx.doi.org/10.5519/0002965>. Sequences are available at BOLD (Barcode-of-Life Datasystem)  
106 under the BEEEE project label. Additional specimens were obtained using pan traps from the survey  
107 described below. The reference set included all available unique UK species as determined by  
108 morphology, with multiple specimens per species where available. These within-species replicates  
109 allowed inclusion of specimens from across the geographical range of widely-distributed species,  
110 identified by different taxonomists and/or belonging to known species complexes.

111           DNA was extracted from a single hind leg using a Qiagen DNeasy Blood and Tissue Kit, after the  
112 specimens were incubated at 56°C in the extraction buffer (ATL and Proteinase K) overnight in a  
113 shaking incubator at 75 rpm. The complete ‘barcode region’ (658 bp) of *cox1* was amplified using  
114 newly designed primers (BEEf TWYTCWACWAAYCATAAAGATATTGG and BEEr  
115 TAWACTTCWGGRTGWCCAAAAAATCA), based on an alignment of 84 mitochondrial genomes from 22  
116 genera. PCR and sequencing using ABI dye terminator sequencing followed standard procedures

117 (Supplementary Material). The sequences were added to BOLD in the project BEEEE, along with  
118 Syrphidae barcodes that were sequenced at the same time.

119 Sequences were aligned using the *MAFFT* v1.3. (Kato *et al.* 2009) plugin in *Geneious*.  
120 Alignments were used for molecular distance-based and coalescence-based species delimitation. (1)  
121 BOLD BINs (Barcode Identification Numbers) were automatically generated for sequences that are  
122 uploaded onto its database (Ratnasingham & Hebert 2013). These BINs are formed using a refined  
123 single linkage network, which combines sequence similarity metrics and graph theory. (2) The GMYC  
124 (Generalized Mixed Yule Coalescent) method determines species limits based on a shift in the rate of  
125 branching along the root-to-tip axis of the phylogenetic tree, separating the speciation (Yule)  
126 processes from fast branching rate expected within population under a neutral coalescent (Fujisawa  
127 & Barraclough 2013). The analysis was done on phylogenetic trees constructed separately for each  
128 genus using BEAST 1.8.1 (Drummond & Rambaut 2007), which was used as the input for the GMYC  
129 analysis (Tang *et al.* 2014). The GMYC was applied to genera with only a single British representative  
130 (*Apis*, *Anthidium*, *Ceratina*, *Dasypoda*, *Macropis* and *Rophites*) by adding supplementary sequences  
131 from BOLD.

132 New barcode sequences for species that were already in BOLD were assessed to examine  
133 whether these new sequences represented new *cox 1* haplotypes for these species. The new  
134 barcodes were searched against a set of 1754 sequences downloaded from BOLD for species known  
135 to exist in the UK using BLASTn on default parameters. Any sequences not 100% identical over the  
136 entire length of the query or subject were designated as novel haplotypes.

137

### 138 **Generating a test dataset from field caught samples using HTS**

139 The reference database was used for identification of specimens obtained through the  
140 National Pollinator and Pollination Monitoring Framework (NPPMF) (Carvell *et al.*, 2016). Mixed

141 samples were collected with pan traps consisting of sets of water-filled bowls (painted UV-yellow,  
142 white and blue, after Westphal *et al.* 2008) from 14 sites across the UK, and further specimens were  
143 collected by netting along standardised transects running 200m from each set of pan traps (Figure  
144 1A, Table S1; see Carvell *et al.* 2016 and supplementary materials for a full description of the  
145 sampling protocol). Bees (Apiformes) were separated from other taxa in the field, stored in 99%  
146 ethanol to preserve DNA for analysis, and transferred to -20°C as soon as possible after collection.  
147 Specimens were identified morphologically by expert taxonomists offering commercial identification  
148 services. In total, 762 bee specimens were processed (480 bees were extracted from the pan traps,  
149 and 282 specimens from the transects and further hand collecting). All specimens were stored in 99%  
150 ethanol and deposited as voucher specimens in the Molecular Collection Facility at the NHMUK.

151 DNA was extracted from individual specimens by piercing the abdomen and submerging the  
152 whole specimen in lysis solution consisting 180ul ATL buffer and 20ul Proteinase K for 12 hours on a  
153 56°C shaking incubator. DNA extractions were performed using either the Qiagen BioSprint 96 DNA  
154 Blood Kit or DNeasy Blood and Tissue kits applied to the lysate. Each DNA extract was PCR amplified  
155 for a 418bp portion of the *cox1* barcode region (Andujar *et al.* 2018). Each individual amplicon was  
156 tagged using a 'double dual' PCR protocol (Shokralla *et al.* 2015) to generate unique tag  
157 combinations for each bee specimen, following the procedures of Arribas *et al.* (2016). Tags were  
158 added in the initial PCR by amplification using tagged *cox1* primers employing different 6 bp  
159 sequence combinations designed with a Hamming distance of 3, with a total of 13 different tagged  
160 primer sets. In all reactions, forward and reverse primers used the same tag, so that the products of  
161 tag jumping could be removed (Schnell *et al.* 2015). Amplicons generated with different primer tags  
162 were pooled, and each pool was cleaned using Agencourt AMPure XP beads (Beckman Coulter,  
163 Wycombe, UK), prior to secondary amplification of each pool with the i5 and i7 Nextera XT indices  
164 with 96 unique MID combinations (Illumina, CA, USA) and sequencing on Illumina MiSeq v.3 (2x300  
165 bp paired-end).

166 Perl scripts of the custom NAPtime pipeline ([www.github.com/tjcreedy/NAPtime](http://www.github.com/tjcreedy/NAPtime)) were used  
167 to wrap bioinformatics filtering of the raw data. The 96 libraries were demultiplexed based on XT  
168 MIDs using Illumina software and were further demultiplexed using NAPdemux based on the unique  
169 tags of the first-round PCR primers. This script wraps cutadapt (Martin 2011) for large demultiplexing  
170 runs, and used the default 10% permitted mismatch to the adapter sequences (permitting no errors  
171 in the 6 bp tag used) before binning reads according to their tags. Mate pairs with only one read  
172 matching the correct tag were discarded. Read quality was reviewed using FASTQC (Andrews 2010).  
173 Following demultiplexing, the NAPmerge script was used to generate a set of full-length reads for  
174 further analysis. The script invokes cutadapt (Martin 2011), PEAR (Zhang *et al.* 2014) and *USEARCH* -  
175 *fastq\_filter* (Edgar 2010) to bulk remove primer sequences, assemble read pairs, and perform quality  
176 filtering. Any reads not containing a correct primer sequence, and their mates, were discarded, and  
177 any merged reads with 1 or more expected errors were removed with *fastq\_filter*. This process  
178 generated a pool of complete *cox1* amplicon sequences for each of the specimens.

179

#### 180 **Testing the utility of the reference dataset**

181 Three methods were used to designate a single putative “high-throughput barcode” (HT  
182 barcode) sequence representing the *cox1* gene of each specimen from the set of reads. Firstly, we  
183 employed a standard metabarcoding pipeline, implemented in the NAPcluster script, to generate  
184 OTU (Operational Taxonomic Units) clusters and centroid sequences using *USEARCH*. The script  
185 includes functions from the *USEARCH* suite (Edgar 2010), starting with the data output from  
186 NAPmerge (merged and quality-filtered amplicons), and comprises the following steps: (i) filtering  
187 sequences by length; (ii) dereplication and filtering by number of reads per unique sequence, to  
188 retain only sequences represented by a set minimum of reads; (iii) denoising using the *UNOISE*  
189 algorithm (Edgar *et al.* 2011); (iv) clustering of sequences according to cluster radius and generation  
190 of an output set of OTU consensus sequences, and (v) mapping of reads to OTU clusters (using



191 *USEARCH usearch\_global* and a custom .uc parser) and generation of an output table of OTU read  
192 numbers by sample. All sequences differing from 418 bp and with only 1 copy were removed in steps  
193 (i) and (ii), and *USEARCH cluster\_otus* was employed for clustering with a dissimilarity threshold of  
194 3%. The centroid of the most abundant OTU was used as the specimen barcode.

195       As sequence variants may drive up the read count of an OTU and thus obscure the haplotype  
196 of the target specimen, the second method for selecting the HT barcode sequence simply chooses  
197 the most frequent read for each library, under the assumption that error-free reads represent the  
198 most abundant template DNA and thus the target specimen. Other sequences that represent nuclear  
199 mitochondrial pseudogenes (NUMTs), gut contents, internalised parasites, and cross-contamination,  
200 or result from PCR or sequencing errors, are expected be present in lower numbers. The extraction of  
201 the most frequent read was performed using a custom perl script.

202       The third method employed a purpose-built tool, NAPselect, that finds the most highly  
203 represented sequence among reads in an amplicon mix, as above, but then statistically and  
204 taxonomically validates this selection. The process starts with steps similar to metabarcoding: firstly,  
205 filter the batch of sequence reads by length (in this case, rejecting any sequence not 418 bp), and  
206 group sequences by identity (i.e. dereplication) recording the abundance of reads representing each  
207 unique sequence. Starting with the most abundant, unique sequences are assessed one-by-one,  
208 using bootstrapping to validate the significance of the difference in read abundance, and using BLAST  
209 to assign the sequence taxonomy. Based on the total number of reads in the sample and the number  
210 of unique sequences, the probability of a sequence occurring as frequently as the most abundant  
211 sequence by chance alone is determined using 10,000 bootstrap iterations. A p-value of 0 designates  
212 a sequence as significantly more frequent with high confidence, and less than 0.5 for low confidence,  
213 above which the entire sample is disregarded because a putative barcode sequence for the target  
214 specimen is not clearly defined. The most abundant sequence is then subjected to a BLASTn search

215 against a local copy of the NCBI *nt* database and the hits assessed for presence in the focal taxon (in  
216 this case, Hymenoptera). Only those sequences passing both these tests are selected.

217 The success of these three methods, and the accuracy of the sequences they output, was  
218 tested by identifying the HT barcode sequences using the BEEEE reference collection of sequences  
219 obtained in section 1. Each of the three putative HT barcodes for each specimen were searched for  
220 matches in the BEEEE reference collection using BLASTn with default parameters. Only matches with  
221 >95% identity and overlap with the reference sequences of >400 bp were retained, and the match  
222 with the similarity was selected, using bitscore to break ties. The identity of this hit was compared  
223 against the known morphological ID for that specimen at the genus and species level. For each HT  
224 barcode selection method and taxonomic level, the number of correct molecular identifications was  
225 tallied and a proportion of failure calculated.

226

#### 227 **Exploration of concomitant DNA in the testing dataset**

228 The OTUs generated with the NAPcluster script (see above) allowed the exploration of co-  
229 amplified DNA from each bee specimen other than the primary *cox1* sequence. For each sample, the  
230 OTUs that did not match the NAPselect HT barcode sequence for the target specimen were  
231 designated as “secondary OTUs”. We used the OTUs for this analysis, rather than the reads, to  
232 reduce unnecessary complexity in the dataset. These OTUs were searched against a local copy of the  
233 NCBI *nt* database using BLASTn, followed by taxonomic binning using MEGAN6 Community Edition  
234 with the weighted Lowest Common Ancestor algorithm (Huson *et al.* 2016). Any OTUs assigned to  
235 Apiformes were additionally identified using BLASTn against the BEEEE reference collection and  
236 the NAPselect HT barcodes (above, section 3). In both cases, BLASTn employed default parameters,  
237 and sequences were identified as the hit with the highest identity where identity was >95% and  
238 overlap was >400 bp, with bitscore breaking ties.

239 NUMTs may appear as separate OTUs in metabarcode data and add spurious OTUs to the  
240 clusters derived from the true mitochondrial copy. A tree-based filtering pipeline was used to identify  
241 NUMT-derived OTUs based on the assumption that they are closely related to the corresponding  
242 mitochondrial copy, and are coincident across sequenced samples, while their copy number is lower.  
243 Thus, OTUs were considered derived from pseudogenes if they were completely coincident across  
244 samples with another closely related OTU that did match a BEEEE reference or specimen barcode,  
245 and the number of reads was significantly lower in comparison.

246 The resulting datasets were reconfigured for various statistics and to perform downstream  
247 calculations using R (Team 2018) packages *plyr* and *reshape2*. The OTU x sample dataset was rarefied  
248 to 400 reads per sample to facilitate valid comparison between samples using the R package *vegan*  
249 (Oksanen *et al.* 2018).

250 Cross-contamination among samples was tested by assessing the distribution of secondary  
251 OTUs in each sample obtained from pan trapping. Only secondary OTUs that matched a (NAPselect)  
252 HT barcode (section 2) from *another* sample were used in this analysis. Three sources of cross-  
253 contamination were considered: contamination from other individuals in the same trap, DNA mixing  
254 between specimens with the same PCR tag on a single plate, and DNA mixing between specimens  
255 with the same Nextera XT tag in a single well. For each source or combination of sources, the total  
256 possible selected barcodes were counted, and then the proportion of those that were present as  
257 secondary OTUs in a sample was calculated. For example, each well in the library preparation  
258 contained 13 specimens tagged with different sequence identifiers: if in a set of these 13 each is a  
259 different species (different HT barcodes), there are 12 possible well contaminants for any one of  
260 these samples, and so a sample containing 3 secondary OTUs from these 12 specimen barcodes  
261 would have a contamination rate of  $3/12 = 0.25$  from well-level contamination. As a control, the rate  
262 of contamination from all possible sources together was also scored, i.e. the proportion of secondary  
263 OTUs in a sample that matched *any* HT barcodes, out of the total number of unique HT barcodes.

264 One-sample  $t$  tests were used to assess if the mean contamination rate for each source or source  
265 combination was significantly greater than zero. To compare between sources against the control,  
266 the effect of source on contamination rate was fitted in a quasi-binomial ANOVA, setting the control  
267 as the reference level.

268

269           **RESULTS**

270 **A reference database of UK bees**

271

272           A total of 355 bee specimens were newly sequenced for the COI barcode to generate the  
273 reference set, representing 165 Linnaean species. These new sequences were added to 1754 full-  
274 length barcode sequences downloaded from the Barcode of Life Database (BOLD) for a total of 2109  
275 sequences. Comparing these datasets (Fig. 1A) the BOLD data represented 245 of the 278 UK bee  
276 species, but comprised only 14 sequences (6 species) from specimens collected in the UK. The 355  
277 new sequences add 10 UK species (15 sequences) not represented in the BOLD dataset, and novel  
278 haplotypes for 107 further species (201 sequences). The final reference set included 255 bee species  
279 (92.4% of 278 species known from the UK). The missing species are either extinct (6 species), rarely  
280 introduced by accident (1 species, *Heriades rubicola*), only found in the Channel Islands (1 species,  
281 *Andrena agilissima*), listed as endangered (RDB3-RDB1) (8 species), or rare and localised (5 species),  
282 while 2 species were only recently added (Cross & Notton 2017; Notton *et al.* 2016). When  
283 considering each of the six families separately, the greatest number of species missing from the  
284 database was in Andrenidae (9 of 69 species), followed by Apidae (4 of 76) and Halictidae (4 of 62).

285           Genetic variation within morphologically identified Linnaean species ranged from 0% to 5.9%  
286 (mean 0.31%, standard error  $\pm 0.04\%$ ), and interspecific variation ranged from 0% to 24.9% (mean  
287  $6.7\% \pm 0.08\%$ ). We found that 242 (94.9%) of *cox1*-based sequence clusters at 97% similarity were an  
288 exact match of the Linnaean species identifications (Supplementary Figure S1). Inconsistency with  
289 the morphological species definitions were limited to five genera, *Andrena*, *Bombus*, *Colletes*,  
290 *Lasioglossum* and *Nomada*.

291 De novo species delimitation from the DNA sequences using the GMYC method were based on  
292 phylogenetic trees generated for each genus (see Fig. 2 for the genus *Nomada*). In most cases of  
293 incongruence, the GMYC either split (42 cases) or lumped (14 cases) an existing nominal species, but  
294 in rare cases the patterns of splitting and lumping were more complex (Fig. 3). The GMYC species  
295 largely agreed with the distance-based BIN network method in the extent to which nominal species  
296 were split and lumped (Fig. 2, 3). Inconsistencies of Linnaean and *cox1*-based entities were mainly  
297 due to groups of close relatives with challenging morphological identifications. Subsets of species not  
298 monophyletic with respect to each other (a requirement of the GMYC method) included: *Andrena*  
299 *bimaculata* - *A. tibialis*, *A. clarkella* - *A. lapponica* - *A. helvola* - *A. varians*, the recently subdivided  
300 *Colletes succinctus* species group (*C. halophilus* - *C. hederæ* - *C. succinctus*) (Kuhlmann et al. 2007),  
301 suspected geographically confined species among the *Dasypoda hirtipes* group (Schmidt et al. 2015),  
302 and variation among *Lasioglossum rufitarse*, *Nomada flava* - *N. leucophthalma* - *N. panzeri*, and *N.*  
303 *goodeniana* - *N. succincta* clusters.

304

### 305 **Testing HTS data against the reference library**

306 Illumina reads generated for 762 bee specimens resulted in an average of 5851 *cox1*  
307 sequences per specimen (amplicon pool) after read merging and stringent quality filtering. Three  
308 methods were used to designate a HT barcode from these sequences for each specimen (see  
309 Materials and Methods). The NAPselect method, which validates barcode selection by statistical  
310 significance of read abundance and taxonomy, obtained a barcode for 749 individuals, failing to do so  
311 for 13 samples that did not produce a dominant (hymenopteran) read, while the OTU clustering and  
312 most-frequent read method produced only 559 and 584 HT barcodes, respectively (Table 1A). Out of  
313 the barcodes chosen by NAPselect, 734 (99.7%) produced a match to sequences in the BEEEE  
314 reference data (Table 1A), confirming these sequences correspond to the target specimens. This

315 proportion of hits to the reference set was equally near 100% with the other two methods, but  
316 because these produced HT barcodes for fewer specimens, they resulted in approx. 25% fewer  
317 specimen identifications. Almost all identifications were to the species level, while between 0 and 3  
318 individuals produced hits to reference sequences identified only to genus (Table 1A). Across all  
319 samples, a total of 154 unique species identifications against the BEEEE reference set were obtained.

320 Congruence of molecular identifications with the morphological identifications of the source  
321 specimens was high at genus level with 95-96%, but only 83-86% of specimens were identified as the  
322 same species with both data types (Table 1B). However, as NAPselect designated a considerably  
323 larger proportion of barcodes to species level, the absolute number of correct species identifications  
324 using this method was the highest, at 611 specimens out of the 762 sequenced (707 correct at genus  
325 level). The proportion of successful molecular identification was compared between different genera  
326 to examine whether there was a taxonomic bias in identification success. The success rate of  
327 molecular identification differed among genera (Figure 4), although this tends to be correlated with  
328 the number of species/sequences in a genus. Species-rich genera that produced markedly more  
329 successful identifications include *Andrena* and *Bombus*, whereas *Colletes* showed low success even  
330 using NAPselect (as expected because some species were inseparable by DNA; see above).

331 We investigated whether the lumping and splitting observed in the reference dataset was a  
332 driver of molecular misidentification by examining the proportion of correct and incorrect matches  
333 against species that were lumped and/or split in the GMYC analysis. Of the 734 HT barcode  
334 sequences generated by NAPselect that had a BLAST match to a BEEEE reference sequence, 17 were  
335 to a species that was lumped, 178 to a species that was split and 1 to a species that was both lumped  
336 and split. The proportion of correct species and genus level matches for these sets of HT barcodes  
337 was very similar to the overall rate: 76.5% of matches to lumped species and 88.2% of matches to

338 split species were correct at the species level (94.1% and 98.8% at the genus level), and the single HT  
339 barcode matching a lumped *and* split species was correct at the species level as well.

#### 340 **Exploration of concomitant DNA in the testing dataset**

341 When OTU clustering was carried out on the entire data set combining the reads from all 762  
342 samples, USEARCH within NAPcluster generated 498 OTUs, of which 263 were identified as  
343 Apiformes using BLAST/MEGAN. Out of these, the tree-based assessment of potential pseudogenes  
344 identified 72 OTUs as likely NUMTs. In addition, several OTUs were reclassified as Diptera in the  
345 phylogenetic tree used for pseudogene filtering. The final count of *bona fide* OTUs identified as  
346 Apiformes was 180, of which 170 had hits to the BEEEE reference library. Apiformes thus dominated  
347 the set of OTUs, but the dataset also included 235 OTUs from across the eukaryotes, including  
348 Diptera (48 OTUs), Coleoptera (6 OTUs), and various other insects (22 OTUs). The Diptera included  
349 several species of hoverflies (Syrphidae), which were present in the traps and were processed  
350 alongside the bees, but are not discussed here. Five of the six Coleoptera OTUs were identified as  
351 common flower visitors, including three species of *Cantharis* Soldier Beetles (Cantharidae), Malachite  
352 Beetles (Malachiidae) and a Pollen Beetle (Nitidulidae), in addition to *Zophobas atratus*, a non-native  
353 species of Darkling Beetle (Tenebrionidae). There were also OTUs from organisms that associate  
354 directly with bees such as Acari (mites) and *Wolbachia* (alphaproteobacteria), as well as several  
355 flowering plants and numerous fungi and oomycetes. The Acari comprised four OTUs, of which one  
356 was identified to species, *Locustacarus buchneri*, a known tracheal parasite of bumblebees, while the  
357 others were identified only as members of the Sarcotiformes, Crotonioidea and Parasitiformes.  
358 Finally, *Homo sapiens* DNA was detected in numerous samples.

359 Quantitative comparisons of OTU distributions across samples were conducted after  
360 rarefaction, which removed 46 samples with fewer than 400 reads, losing 15 OTUs. Rarefied samples  
361 had between 1 and 26 OTUs, with a mean of 5.9 (SD = 3.9). The majority of samples had secondary



362 OTUs beyond the specimen barcode sequence. Secondary OTUs contributed an average of 25.7% (SD  
363 = 33%) of the samples reads; in 238 cases, secondary OTUs contributed over 50% of the reads. The  
364 taxonomic composition of secondary OTUs (Fig. 5) showed that most samples had at least one other  
365 bee OTU, sometimes as many as 8, out of the 132 total Apiformes OTUs that were recognised as  
366 secondary OTU at least once (48 OTUs of Apiformes were only recovered as the primary OTU).  
367 Beyond Hymenoptera, high OTU numbers were contributed by Diptera, with up to 10 OTUs in a  
368 single sample, and fungi (maximum 13 OTUs in one sample and a total of 40 across all samples) (Fig.  
369 5). However, no higher taxon was found consistently across all samples apart from the bees.

370       The high incidence of NAPselect barcode sequences (i.e. Apiformes) occurring as secondary  
371 OTUs raised the question about the origin of these non-target specimens in the barcoding mix.  
372 Potential sources of DNA may be carry-over from the traps, mixing of specimens during handling for  
373 taxonomic identification, and errors in various DNA laboratory procedures. In general, the level of  
374 direct contamination with DNA sequences that were the primary OTU in another sample was low,  
375 but significantly greater than zero for most sources and source combinations (Supplementary Table  
376 S1). Altogether, 132 of the 180 Apiformes OTUs were recognised as secondary OTUs in at least one  
377 sample, and 110 of these match to one of the barcode sequences from other wells. Compared with  
378 the control, i.e. the background level of cross-contamination from any source, there was a significant  
379 increase in contamination rate for within-plate contamination and within-plate and trap  
380 contamination (Fig. 6, Supplementary Table S1), indicating that the greatest rate of contamination  
381 may have been at the level of library construction, i.e. from mixing among the 96 Illumina tags. The  
382 level of cross-contamination was much lower for those samples in the same well, i.e. the  
383 combination of 13 different products from the primary PCRs conducted with a different primer tag  
384 each.

385        The low level of contamination was reflected in the pattern of cross-contamination of  
386 individual species. OTUs identified to 23 different species were each found as secondary OTUs in at  
387 least one other sample of a different species from the same trap. The most frequent of these was  
388 *Lasioglossum malachurum*, of which there were 37 specimens in the study from 21 traps. We HT  
389 barcoded 63 specimens of other species from these 21 traps, and *L. malachurum* was found in 13 of  
390 these, a rate of 20%. At trap level, the average rate for the 23 species was 7.6% (SD = 4.5). The same  
391 analysis for plates and wells showed that *Lasioglossum calceatum* was the most common cross-  
392 contaminator here, being found in 7% of samples of other species sharing a plate (PCR tag) with  
393 specimens of *L. calceatum*, and 5% of samples of other species sharing a well (MID) with *L.*  
394 *calceatum*. 45 species cross-contaminated within plates, with a mean rate of 2.2% (SD = 1.7), and 13  
395 species cross-contaminated within wells (mean = 2.5%, SD = 1.1).

396

397 **DISCUSSION**

398 **The reference database**

399 Cost-effective species-level identifications of bees and other insect pollinators are required to  
400 provide robust evidence for population changes and to inform land use management and  
401 conservation (Gill *et al.* 2016). We conducted this analysis in two stages, by first building the  
402 reference database using conventional sequencing technology, which was then trialled for species  
403 identification using high-throughput sequencing of samples from a proof-of-concept monitoring  
404 scheme. The combined effort of new sampling and sequencing, together with barcode data already  
405 in the BOLD database, resulted in a virtually complete set of the UK bees, with only a few rare or  
406 presumed extinct species missing. Furthermore, we expanded existing references by generating  
407 novel sequences from UK populations of widespread species. The *cox1* barcode delimited 94.9% of  
408 species in the reference database as separate entities, showing that for almost all bee species in the  
409 UK this set is sufficiently discriminatory. In the remaining cases the molecular analysis lumped the  
410 Linnaean species, as evident in the *de novo* species delimitation using the GMYC method, while an  
411 even greater proportion were shown to be split into additional GMYC groups which, however, were  
412 not incongruent with the Linnaean species.

413 The overall reference database comprises a mixture of UK and non-UK sequences, as many  
414 species are more widely distributed in Europe and North America from which many barcodes were  
415 obtained, and the species discrimination may be even clearer if performed with UK samples only, as a  
416 local subset of intra-specific variation exacerbates the species-level differences (Bergsten *et al.*  
417 2012). Importantly, the high congruence of molecular groups with the Linnaean species also shows  
418 that the mitochondrial 'gene trees' are a good reflection of the species-level entities, as both  
419 morphological diagnostics and mitochondrial markers corroborate the species hypotheses (DeSalle *et*  
420 *al.* 2005), and thus the use of multiple markers for species delimitation is generally not required.

421 Finally, congruence with the BOLD database also suggests that the identifications have been correct,  
422 in some cases after secondary inspection of specimens.

423       The molecular data failed to separate a small number of species in four of the 27 genera  
424 studied (“lumped” in Fig. 3). In some instances, such as the *Colletes succinctus* species group,  
425 morphological identification of three named species is reliable, if challenging, now that there is a key  
426 covering all UK species (Falk & Lewington 2015), and there are biological and distributional  
427 differences. *Cox1* sequences are not sufficient to delineate these species (Kuhlmann *et al.*, 2007), and  
428 morphotaxonomy remains the most reliable method for this species group. Similarly, the separation  
429 of the *Nomada goodeniana-succincta* group relies on subtle colour variants (Falk & Lewington 2015)  
430 and cryptic species are likely to exist. Additional genetic markers may be useful; e.g. the three  
431 recognised *Colletes* species lumped in *cox1* exhibit fixed differences in EF-1a and ITS (Kuhlmann  
432 2007). Vice versa, divergent *cox1* entities (splitting) may indicate the existence of hitherto  
433 unrecognised species. For example, a divergent haplotype in *Dasypoda hirtipes* has now been  
434 associated with a morphologically differentiated, eastern European species that is not part of the UK  
435 fauna (Schmidt *et al.* 2015). We have already curated the *cox1* database extensively, in particular to  
436 remove morphological identification errors (Supplementary Text), but the new clusters may lead to  
437 the discovery of separate entities within the Linnaean species and may provide fertile ground for  
438 future morphological work. Since DNA extraction destroyed only one leg, morphological vouchers  
439 can be re-examined, an important process in refining the reference database.

440

#### 441 **Generating high throughput barcodes**

442       The newly created *cox1* database was then used to identify species from a survey of pan  
443 traps using high-throughput barcoding (“HT barcoding”). The methodology has great potential for  
444 sequencing mixed samples (metabarcoding) but was here applied on individual specimens to test the

445 efficacy of this approach and our ability to confidently recover a sequence for the target specimen.  
446 We employed three methods for designating this sequence from a pool of anonymous amplicons.  
447 The most intuitive approach was to undertake a standard metabarcoding analysis using the *USEARCH*  
448 pipeline to designate the centroid sequence of the most highly represented OTU in each sample as  
449 the HT barcode sequence. However, the sequence obtained with this method did not produce a  
450 BLAST hit to the reference database in 27% of cases. An alternative method was to simply select the  
451 most frequent unique sequence in the amplicon pool, analogous to the sequence that would be  
452 generated by Sanger sequencing. However, while this method also designates a barcode for every  
453 sample, these sequences are only marginally more likely to find a match to the reference database  
454 (23% did not produce a BLAST hit).

455       The third method, implemented in the NAPselect script, also selects the top-abundant read,  
456 but requires that this read matches a specific taxonomic group (in this case, Hymenoptera), and that  
457 the read frequency is significantly greater than frequencies of other reads. If these conditions are not  
458 met, NAPselect then discards the top read and checks other reads according to descending  
459 abundance. This pipeline did not output a sequence for 13 specimens, disregarding samples with low  
460 read numbers or low differentiation among other abundant reads. However, the majority of the  
461 remaining sequences matched the reference database, and only 3.7% of specimens did not produce  
462 a sequence with a BLAST hit - a substantial improvement over the other methods (Table 1). The key  
463 improvement introduced by this script probably was that NAPselect conducts BLAST searches against  
464 GenBank and assesses the taxonomy of the hits, which was specified to allow BLAST errors. This  
465 method is clearly very effective, with error rates determined largely by sequencing depth issues  
466 rather than an inability to select the correct sequence.

467

468

#### 469 **Exploration of concomitant DNA in the testing dataset**

470 Unlike standard metabarcoding conducted on mixed samples, the current analysis permits a  
471 precise determination of amplicons derived from single specimens. A surprising finding was the high  
472 proportion of reads attributable to secondary OTUs, and their taxonomic diversity. The specimens  
473 from the monitoring program were not substantially different from those used in Sanger sequencing  
474 to build the reference database (in some cases used for both purposes), which produced clean base  
475 calls consistent with a single predominant PCR product. However, the primers for Illumina  
476 sequencing were designed for broad amplification of arthropods (Arribas *et al.* 2016) and probably  
477 have a wider taxonomic amplitude than the Hymenoptera-specific primers used to amplify the  
478 standard 'barcode' region. Besides co-amplification of a broader range of associated species, this  
479 may also increase the potential for sequencing of pseudogenes. Out of 509 OTUs recovered from all  
480 samples combined, 263 were identified as Apiformes initially, which greatly exceeds the number of  
481 species expected in this survey. Pseudogenes diverge without the constraints of coding regions and  
482 thus can be partially eliminated based on length differences. For example, a preliminary analysis that  
483 did not constrain the read filtering to the target length of 418 bps obtained six additional OTUs  
484 assigned to humans, all of which were confidently identified as known mitochondrial pseudogenes.  
485 However, filtering the reads to a fixed length could not avoid this problem sufficiently. We therefore  
486 implemented a further filter based on the distribution of low-abundance OTUs that are co-  
487 distributed with the true mitochondrial copies. We only removed OTUs that form a clade with the  
488 presumed true copy (close matches to the reference database), under the assumption that nuclear  
489 pseudogenes are of limited evolutionary persistence before they diverge too far from the  
490 mitochondrial ancestor and no longer are captured by the PCR primer. Based on these criteria a total  
491 of 72 OTUs were identified as mitochondrial pseudogenes. This method (and the removal of several  
492 other OTUs whose incorrect assignment was revealed with the phylogeny) reduced the total number  
493 of Apiformes OTU to 180, which is closer to the 154 species identified morphologically, in particular if

494 OTU splitting (Fig. 4) is taken into account. The procedure for identifying these likely pseudogene  
495 OTUs is a novel step in the metabarcoding filtering process which, to our knowledge, has been  
496 implemented here for the first time. However, it is dependent on “true” OTUs being identified by a  
497 reference collection and that there exists a high level of read variation between the set of target *cox1*  
498 OTUs and their putative pseudogenes – both situations that are common in HT barcoding studies but  
499 less so in some metabarcoding. Here, it proved to be a critical step preventing the overestimate of  
500 species richness frequently seen in metabarcoding studies.

501 Other secondary OTUs were assignable to a wide range of distantly related taxa, including  
502 highly plausible associates of pollinator communities, which suggests carry-over of DNA with the  
503 target specimens. Extraneous insect species in the sequencing mixture mostly consisted of other  
504 known pollinators attracted to flowers (and pan traps), including various Coleoptera and Diptera.  
505 Consistent with the detection of pollen beetles (*Meligethes*), numerous specimens were observed in  
506 the pan traps. Species of Diptera included the wheat stem borer *Cephus pygmeus*, a flower visitor  
507 whose larvae feed in the stems of cereal crops and wild grasses (Poaceae), and *Sarcophaga* sp. (flesh  
508 flies) that are carrion feeders or parasitoids of other invertebrates. The greatest proportion were  
509 hoverflies (Syrphidae); these were widely present in the traps and were processed in a parallel study  
510 in the same sequencing run and thus additionally exposed to the risk of laboratory contamination as  
511 well as trap contamination. Other sequencing records were consistent with internal parasites,  
512 including a species of tracheal mite, *Locustacarus buchneri*, known to be associated with bumble  
513 bees (*Bombus* sp.), and numerous bacterial sequences. OTUs belonging to Angiospermae suggest the  
514 types of flowering plants pollinators visited, including *Caryophyllales* sp., *Cichorieae* sp., *Geraniaceae*  
515 sp. and Lamiids (a large clade of flowering plants that includes many species present in meadows). In  
516 addition, widely observed ‘unknown’ OTUs to which MEGAN could not confidently assign an identity  
517 may be members of taxa that were poorly represented in GenBank, or they may be chimeras or  
518 sequencing errors that escaped filtering. Yet, most secondary OTUs are plausible as true associates of

519 the target specimens and the wider pollinator community. Thus, associated DNA can be used to  
520 detect local community composition and ecological associations, including parasites, symbionts and  
521 diet of the target.

522       Cross contamination in the traps may also explain the large number of secondary OTUs  
523 assigned to Apiformes (beyond the pseudogenes). The potential for DNA mixing was further  
524 increased as specimens from the same pan trap were stored together prior to morphological  
525 identification and DNA extraction. However, we find that the greatest rate of contamination may  
526 have been within a single plate, i.e. between samples with the same primer index but different  
527 library indices, which could be either due to physical mixing in the laboratory, tag-jumping (in the  
528 library indices, not the PCR tags), or errors in index sequencing. Trap-level contamination may add to  
529 the problem, as the combined model (plate x trap) shows only marginally higher levels of  
530 contamination (Supplementary Table S1). Because the contamination within the wells was much  
531 lower, we conclude that the primary PCR using 13 different primer tags before being combined in a  
532 single Nextera XT library was not greatly affected by these problems, indicating that our approach of  
533 using the same unique primer tags on forward and reverse strands can largely eliminate the problem  
534 of misassignment of PCR fragments. In addition, some types of contamination were less likely to be  
535 introduced during molecular lab processing, given the precautions with specimen handling and the  
536 strict protocols of the sequencing facility, in particular regarding the widely found human DNA,  
537 present in virtually every one of the specimens. As scientists using morphological and molecular  
538 methods work together, greater awareness of these issues is needed and the steps to avoid DNA  
539 contamination should be understood and implemented, such as the use of clean pans, bee nets and  
540 storage bottles, and use of latex gloves for specimen handling during morphological identification.

541

542



## 543 Conclusions

544 High-throughput sequencing can greatly change the approach to monitoring of pollinators,  
545 through mass identification of sequence reads against reference databases verified by taxonomic  
546 specialists. In this proof-of-concept study we used individuals, rather than bulk samples, to study the  
547 outcome of metabarcoding in greater detail. We first established the power of the *cox1* marker for  
548 species discrimination, which only left about 5% of UK species without a precise identification at  
549 species level. The subsequent utilization of the database for UK bees monitoring shows high  
550 consistency with morphological identifications conducted in parallel. However, the deep sequencing  
551 of single specimens also revealed the various pitfalls of metabarcoding. We detected surprisingly  
552 high levels of apparent mixing with other specimens from the same and other traps. In addition, we  
553 found numerous OTUs apparently contributed by pseudogenes, which greatly inflate estimates of the  
554 total species diversity; they can be filtered out efficiently as their distribution 'trails' the actual  
555 mitochondrial copies, which should be a routine part of the read filtering procedure. Lastly, the  
556 widely used OTU clustering may not produce the most accurate species detection, as shown by a  
557 comparison of OTU analyses against the most abundant read in each sample (after adequate  
558 taxonomic and numerical filtering), which revealed a full identification of the target specimen in  
559 approximately 25% more samples. Yet, applied under stringent quality filtering, it is possible to use  
560 high-throughput sequence data at the read level, i.e. to establish genotypic variation or for  
561 assignment to particular subgroups within the Linnaean species, and thus use them in the same way  
562 as data from Sanger sequencing, but scaled up by orders of magnitude. The method thus greatly  
563 increases the accuracy and speed of taxonomic identification in pollinator monitoring, at reduced  
564 cost, while also providing further information on species interactions and ecosystem composition  
565 through the secondary OTUs. The bioinformatics methodology and comprehensive barcode database  
566 can now be rolled out for the study of much larger number of specimens typically obtained by  
567 passive pan traps and can be extended to studies of pollinators in other parts of the world.

568

## 569 **ACKNOWLEDGEMENTS**

570 This work was funded by the UK Department of Environment, Forestry and Rural Affairs (Defra)  
571 of the UK (contract PH0521), with in-kind contributions from the NHMUK, and a fellowship of the  
572 NERC Science Solutions for a Changing Planet Doctoral Training Programme at Imperial College (to  
573 HN). The bioinformatics pipelines were developed under the iBioGen project funded by the European  
574 Commission. The NPPMF pilot pan trapping study was jointly funded by Defra and Scottish  
575 Government under project WC1101. We acknowledge the Borough of Lewisham (Blackheath), Bristol  
576 City Council (The Downs, Troopers Hill), Conservators of Wimbledon and Putney Commons, Land  
577 Trust (Greenwich Peninsula Ecology Park), National Trust (Bookham Common, Leigh Woods), Natural  
578 England (Hartslock SSSI), and Royal Borough of Greenwich (Blackheath) for permission for DGN to  
579 collect bees. Jackie Mackenzie-Dodds (NHMUK) and NPPMF staff are thanked for making the NPPMF  
580 collection available. Martin Harvey, Stuart Roberts and Ivan Wright conducted the morphological  
581 identifications of bees sampled in the NPPMF pilot study.

582

## 583 **Data accessibility**

584 Sequence data available at BOLD under the BEEEE label. Perl scripts used for the sequence  
585 clustering and barcode selection are available at <https://github.com/tjcreedy/NAptime>.

586

## 587 **Author contributions**

588 CQT, HN and APV designed the study; CQT and HN generated molecular data; TJC, CQT, KQC  
589 and HN performed data analysis. TJC developed bioinformatics tools. CC, KC and RO collected  
590 specimens and co-ordinated morphological identifications. DGN collected specimens, identified,

591 documented, sampled them, preserved morphological vouchers, and verified identification. PA and  
592 CA designed analytical pipelines and provided advice on project design and analysis. CQT, HN, TJC,  
593 KQC and APV wrote an initial draft of the manuscript. All authors contributed to the writing of the  
594 final draft.

595

596 **Competing interests**

597 CQT is Senior Scientist and APV is on the Science Advisory Board of NatureMetrics, a company  
598 offering commercial services in DNA-based biomonitoring.

599

600

## 601 REFERENCES

- 602 Amiet F, Herrmann M, Müller A, Neumeyer R (2001) Apidae 3 - *Halictus*, *Lasioglossum*. *Fauna*  
603 *Helvetica* **6**, 1–208.
- 604 Amiet F, Herrmann M, Müller A, Neumeyer R (2004) Apidae 4 - *Anthidium*, *Chelostoma*, *Coelioxys*,  
605 *Dioxys*, *Heriades*, *Lithurgus*, *Megachile*, *Osmia*, *Stelis*. *Fauna Helvetica* **9**, 1–273.
- 606 Amiet F, Herrmann M, Müller A, Neumeyer R (2010) Apidae 6 - *Andrena*, *Melitturga*, *Panurginus*,  
607 *Panurgus*. *Fauna Helvetica* **26**, 1–317.
- 608 Amiet F, Herrmann M, Müller A, Neumeyer R (2007) Apidae 5 - *Ammobates*, *Ammobatoides*,  
609 *Anthophora*, *Biastes*, *Ceratina*, *Dasygoda*, *Epeoloides*, *Epeolus*, *Eucera*, *Macropis*,  
610 *Melecta*, *Melitta*, *Nomada*, *Pasites*, *Tet*. *Fauna Helvetica* **20**, 1–356.
- 611 Amiet F, Müller A, Neumeyer R (2014) Apidae 2 - *Colletes*, *Dufourea*, *Hylaeus*, *Nomia*, *Nomioides*,  
612 *Rhophitoides*, *Rophites*, *Sphecodes*, *Systropha*. *Fauna Helvetica* **4**, 1-239.
- 613 Andujar C, Arribas P, Gray C, *et al.* (2018) Metabarcoding of freshwater invertebrates to detect the  
614 effects of a pesticide spill. *Molecular Ecology* **27**, 146-166.
- 615 Arribas P, Andujar C, Hopkins K, Shepherd M, Vogler AP (2016) Metabarcoding and mitochondrial  
616 metagenomics of endogean arthropods to unveil the mesofauna of the soil. *Methods in*  
617 *Ecology and Evolution* **7**, 1071-1081.
- 618 Bergsten J, Bilton DT, Fujisawa T, *et al.* (2012) The effect of geographical scale of sampling on DNA  
619 barcoding. *Systematic Biology* **61**, 851-869.
- 620 Biesmeijer JC, Roberts SPM, Reemer M, *et al.* (2006) Parallel declines in pollinators and insect-  
621 pollinated plants in Britain and the Netherlands. *Science* **313**, 351-354.
- 622 Bogusch P, Straka J (2012) Review and identification of the cuckoo bees of central Europe  
623 (Hymenoptera: Halictidae: Sphecodes). *Zootaxa*, 1-41.
- 624 Carvell C, Isaac NJB., Jitlal M, *et al.* (2016) Design and Testing of a National Pollinator and Pollination  
625 Monitoring Framework. Final summary report to the Department for Environment, Food and  
626 Rural Affairs (Defra), Scottish Government and Welsh Government: Project WC1101.
- 627 Cross I, Notton DG (2017) Small-headed Resin Bee, *Heriades rubicola*, new to Britain (Hymenoptera:  
628 Megachilidae). *British Journal of Entomology and Natural History* **30**, 1-6.
- 629 DeSalle R, Egan MG, Siddall M (2005) The unholy trinity: taxonomy, species delimitation and DNA  
630 barcoding. *Philosophical Transactions of the Royal Society London Series B* **360**, 1905-1916.
- 631 Drummond AJ, Rambaut A (2007) BEAST: Bayesian evolutionary analysis by sampling trees. *BMC*  
632 *Evolutionary Biology* **7**, Art. 214.
- 633 Edgar R (2010) *USEARCH fastq\_filter*, available online at <https://www.drive5.com/usearch/>.
- 634 Edgar RC, Haas BJ, Clemente JC, Quince C, Knight R (2011) UCHIME improves sensitivity and speed of  
635 chimera detection. *Bioinformatics* **27**, 2194-2200.
- 636 Falk SJ, Lewington R (2015) *Field guide to the bees of Great Britain and Ireland* Bloomsbury Publishing  
637 PLC.
- 638 Fujisawa T, Barraclough TG (2013) Delimiting species using single-locus data and the Generalized  
639 Mixed Yule Coalescent approach: A revised method and evaluation on simulated data sets.  
640 *Systematic Biology* **62**, 707-724.
- 641 Garibaldi LA, Steffan-Dewenter I, Winfree R, *et al.* (2013) Wild pollinators enhance fruit set of crops  
642 regardless of Honey Bee abundance. *Science* **339**, 1608-1611.
- 643 Gill RJ, Baldock KCR, Brown MJF, *et al.* (2016) Protecting an ecosystem service: Approaches to  
644 understanding and mitigating threats to wild insect pollinators. In: *Ecosystem Services: From*  
645 *Biodiversity to Society, Pt 2* (eds. Woodward G, Bohan DA), pp. 135-206.
- 646 Hallmann CA, Sorg M, Jongejans E, *et al.* (2017) More than 75 percent decline over 27 years in total  
647 flying insect biomass in protected areas. *Plos One* **12**.
- 648 Hebert PDN, Cywinska A, Ball SL, DeWaard JR (2003) Biological identifications through DNA barcodes.  
649 *Proceedings of the Royal Society B* **270**, 313-321.

- 650 Huson DH, Beier S, Flade I, *et al.* (2016) MEGAN Community Edition - Interactive exploration and  
651 analysis of large-scale microbiome sequencing data. *Plos Computational Biology* **12**.
- 652 Isaac NJB, Pocock MJO (2015) Bias and information in biological records. *Biological Journal of the*  
653 *Linnean Society* **115**, 522-531.
- 654 Katoh K, Asimenos G, Toh H (2009) Multiple alignment of DNA sequences with MAFFT. In: *Methods in*  
655 *Molecular Biology* (ed. D P), pp. 39-64. Humana Press.
- 656 Kennedy CM, Lonsdorf E, Neel MC, *et al.* (2013) A global quantitative synthesis of local and landscape  
657 effects on wild bee pollinators in agroecosystems. *Ecology Letters* **16**, 584-599.
- 658 Kuhlmann M, Else GR, Dawson A, Quicke DLJ (2007) Molecular, biogeographical and phenological  
659 evidence for the existence of three western European sibling species in the *Colletes*  
660 *succinctus* group. *Organisms Diversity and Evolution*, 7(2): 155-165.
- 661 Kuhlmann M (2007) Revision of the bees of the *Colletes fasciatus*-group in southern Africa  
662 (Hymenoptera: Colletidae). *African Invertebrates* **48**, 121-165.
- 663 Lebuhn G, Droege S, Connor EF, *et al.* (2013) Detecting insect pollinator declines on regional and  
664 global scales. *Conservation Biology* **27**, 113-120.
- 665 Lever JJ, van Nes EH, Scheffer M, Bascompte J (2014) The sudden collapse of pollinator communities.  
666 *Ecology Letters* **17**, 350-359.
- 667 Martin M (2011) Cutadapt removes adapter sequences from high-throughput sequencing reads.  
668 *EMBnet* **17**, 10-12.
- 669 Meier R, Wong W, Srivathsan A, Foo M (2015) \$1 DNA barcodes for reconstructing complex  
670 phenomes and finding rare species in specimen-rich samples. *Cladistics*, n/a-n/a.
- 671 Notton DG, Cuong Quoc T, Day AR (2016) Viper's Bugloss Mason Bee, *Hoplitis (Hoplitis) adunca*, new  
672 to Britain (Hymenoptera, Megachilidae, Megachilinae, Osmiini). *British Journal of*  
673 *Entomology and Natural History* **29**, 134-143.
- 674 Oksanen J, Blanchet G, Friendly M, *et al.* (2018) *vegan: Community Ecology Package. R package*  
675 *version 2.5-1* available at <http://cran.r-project.org/>.
- 676 Potts SG, Roberts SPM, Dean R, *et al.* (2010) Declines of managed honey bees and beekeepers in  
677 Europe. *Journal of Apicultural Research* **49**, 15-22.
- 678 Ratnasingham S, Hebert PDN (2013) A DNA-based registry for all animal species: The Barcode Index  
679 Number (BIN) system. *Plos One* **8**.
- 680 Ricketts TH, Regetz J, Steffan-Dewenter I, *et al.* (2008) Landscape effects on crop pollination services:  
681 are there general patterns? *Ecology Letters* **11**, 499-515.
- 682 Schmidt S, Schmid-Egger C, Moriniere J, Haszprunar G, Hebert PDN (2015) DNA barcoding largely  
683 supports 250 years of classical taxonomy: identifications for Central European bees  
684 (Hymenoptera, Apoidea partim). *Molecular Ecology Resources* **15**, 985-1000.
- 685 Schnell IB, Bohmann K, Gilbert MTP (2015) Tag jumps illuminated - reducing sequence-to-sample  
686 misidentifications in metabarcoding studies. *Molecular Ecology Resources* **15**, 1289-1303.
- 687 Shokralla S, Porter TM, Gibson JF, *et al.* (2015) Massively parallel multiplex DNA sequencing for  
688 specimen identification using an Illumina MiSeq platform. *Scientific Reports* **5**.
- 689 Smith MA, Rodriguez JJ, Whitfield JB, *et al.* (2008) Extreme diversity of tropical parasitoid wasps  
690 exposed by iterative integration of natural history, DNA barcoding, morphology, and  
691 collections. *Proceedings of the National Academy of Sciences of the United States of America*  
692 **105**, 12359-12364.
- 693 Tang CQ, Humphreys AM, Fontaneto D, Barraclough TG (2014) Effects of phylogenetic reconstruction  
694 method on the robustness of species delimitation using single-locus data. *Methods in Ecology*  
695 *and Evolution* **5**, 1086-1094.
- 696 Team RC (2018) *R: A language and environment for statistical computing. R Foundation for Statistical*  
697 *Computing, Vienna, Austria.* URL <https://www.R-project.org/>.

- 698 Vanbergen AJ, Baude M, Biesmeijer JC, *et al.* (2013) Threats to an ecosystem service: pressures on  
699 pollinators. *Frontiers in Ecology and the Environment* **11**, 251-259.  
700 Westphal C, Bommarco R, Carre G, *et al.* (2008) Measuring bee diversity in different European  
701 habitats and biogeographical regions. *Ecological Monographs* **78**, 653-671.  
702 Yoccoz NG, Brathen KA, Gielly L, *et al.* (2012) DNA from soil mirrors plant taxonomic and growth form  
703 diversity. *Molecular Ecology* **21**, 3647-3655.  
704 Zhang JJ, Kobert K, Flouri T, Stamatakis A (2014) PEAR: a fast and accurate Illumina Paired-End reAd  
705 mergeR. *Bioinformatics* **30**, 614-620.

706

707

708

709 **Tables and Figures**

710

|                                                                                                          |                                                          |                       | Most frequent OTU | Most frequent read | NAPselect          |
|----------------------------------------------------------------------------------------------------------|----------------------------------------------------------|-----------------------|-------------------|--------------------|--------------------|
| <b>A</b>                                                                                                 |                                                          |                       |                   |                    |                    |
| Of 762 total specimens:                                                                                  | Specimens with sequences                                 |                       | 762               | 762                | 749                |
|                                                                                                          | Specimens with sequences matching reference dataset      |                       | 559               | 584                | 734                |
| Of 761 specimens with species-level morphological identifications and 1 with genus-level identification: | Sequences with species-level molecular identification    |                       | 556 (99.5%)       | 584 (100%)         | 732 (99.7%)        |
|                                                                                                          | Sequences with only genus-level molecular identification |                       | 3 (0.5%)          | 0 (0%)             | 2 (0.3%)           |
| <b>B</b>                                                                                                 |                                                          |                       |                   |                    |                    |
| Morphological ID level                                                                                   | Molecular ID level                                       |                       | Most frequent OTU | Most frequent read | NAPselect sequence |
| Species                                                                                                  | Species                                                  | Total comparisons     | 555               | 583                | 731                |
|                                                                                                          |                                                          | Species-level correct | 471 (84.9%)       | 506 (86.8%)        | 611 (83.6%)        |
|                                                                                                          |                                                          | Genus-level correct   | 528 (95.1%)       | 565 (96.9%)        | 707 (96.7%)        |
| Species                                                                                                  | Genus                                                    | Total comparisons     | 3                 | 0                  | 2                  |
|                                                                                                          |                                                          | Genus-level correct   | 3 (100%)          |                    | 2 (100%)           |
| Genus                                                                                                    | Species                                                  | Total comparisons     | 1                 | 1                  | 1                  |
|                                                                                                          |                                                          | Genus-level correct   | 1 (100%)          | 1 (100%)           | 1 (100%)           |

711

712 Table 1. The recovery success of different methods of barcode selection and the rate of accurate  
713 identification of barcodes against the BEEE reference set. Table 1A. The number of sequences  
714 obtained, the number of matches to a sequence in the reference collection and proportion of those  
715 that produce a species or genus level identification, respectively. Table 1B. The accuracy of  
716 identification, relative to the morphological identification of the specimen, at different levels of  
717 morphological or molecular identification. Note that the NAPselect method returned the highest  
718 absolute number of correct identifications.

719



720

721 Figure 1

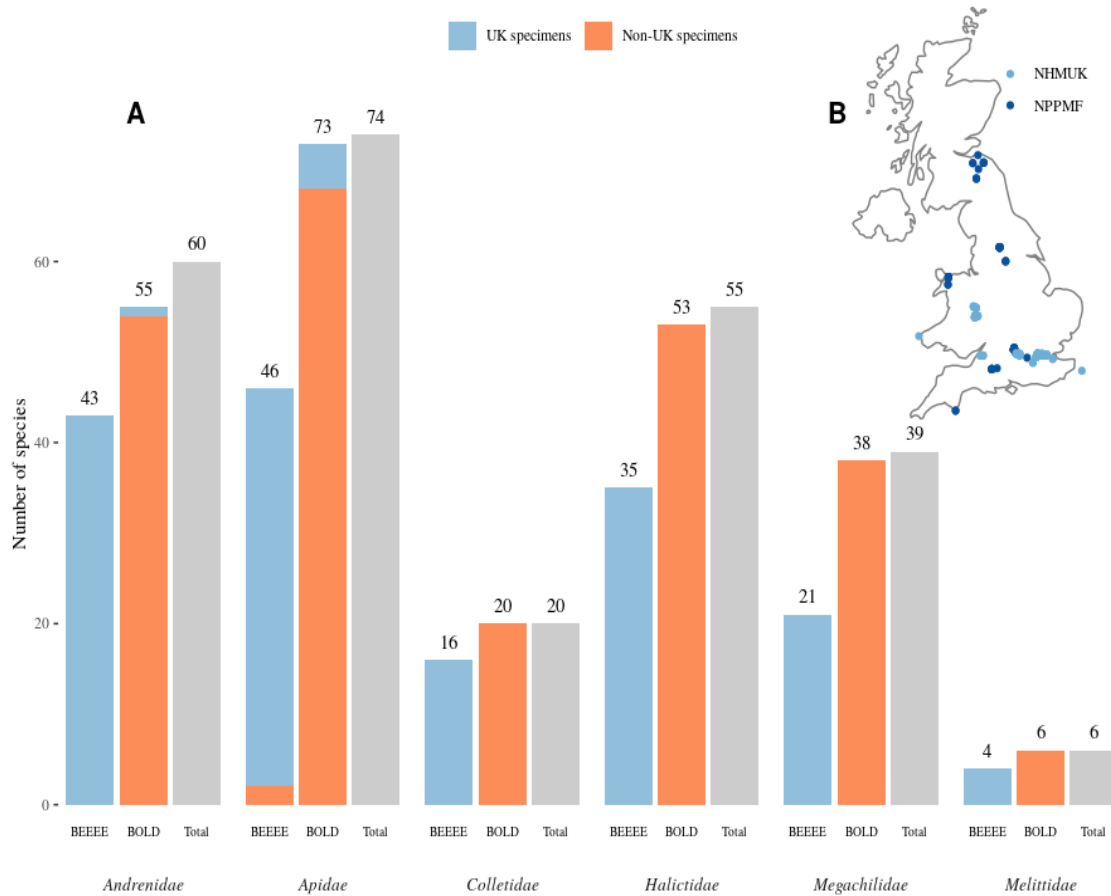

722

723

724 Fig. 1. Specimens and species used in this study. A. The number of bee species of each family, dataset  
 725 and geographical source from which sequences were compiled to form the reference collection,  
 726 Column colours denote whether species from each dataset comprised any UK specimens, and  
 727 numbers above bars give totals, The BEEEE columns denote the species sequenced as part of this  
 728 study (165), which were compiled with existing BOLD sequences (245 species) to form the total  
 729 number of species sequenced per family. This dataset comprises 255 of the 278 bee species in the  
 730 UK. B. Sampling localities of bee specimens collected by NHMUK and the NPPMF that formed the  
 731 BEEEE reference set of specimens

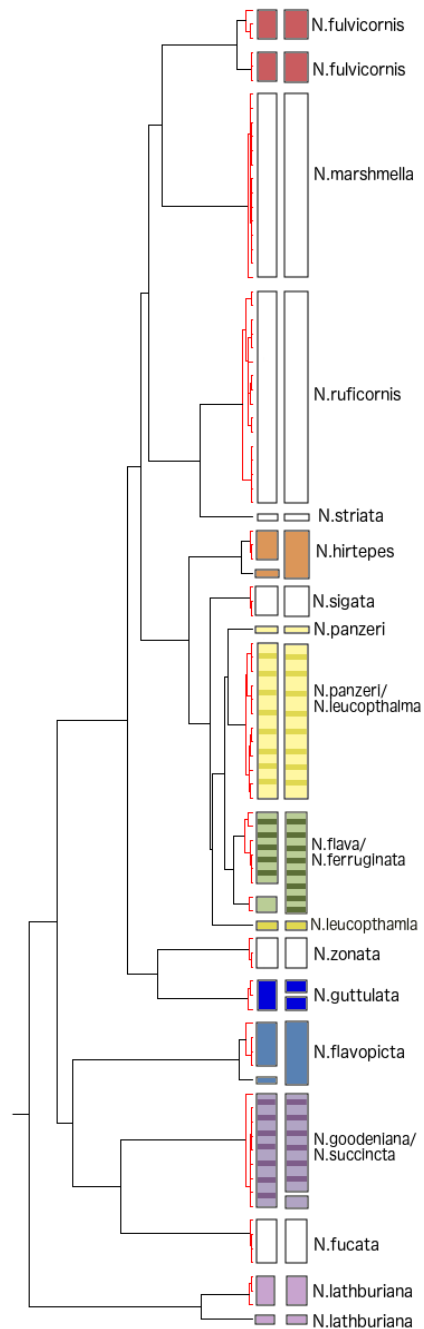

732

733 Figure 2. GMYC and BOLD analysis of a subset of the genus *Nomada*. The first column of boxes  
734 demonstrates the GMYC species, and the second column of boxes the BOLD bins. Boxes with no fill  
735 show species which are not split or lumped with other species in both the GMYC and BOLD analysis.  
736 Each colour represents a different species which is either split, lumped or both in either the GMYC or  
737 BOLD analysis, or in both. The species names are shown on the tree.

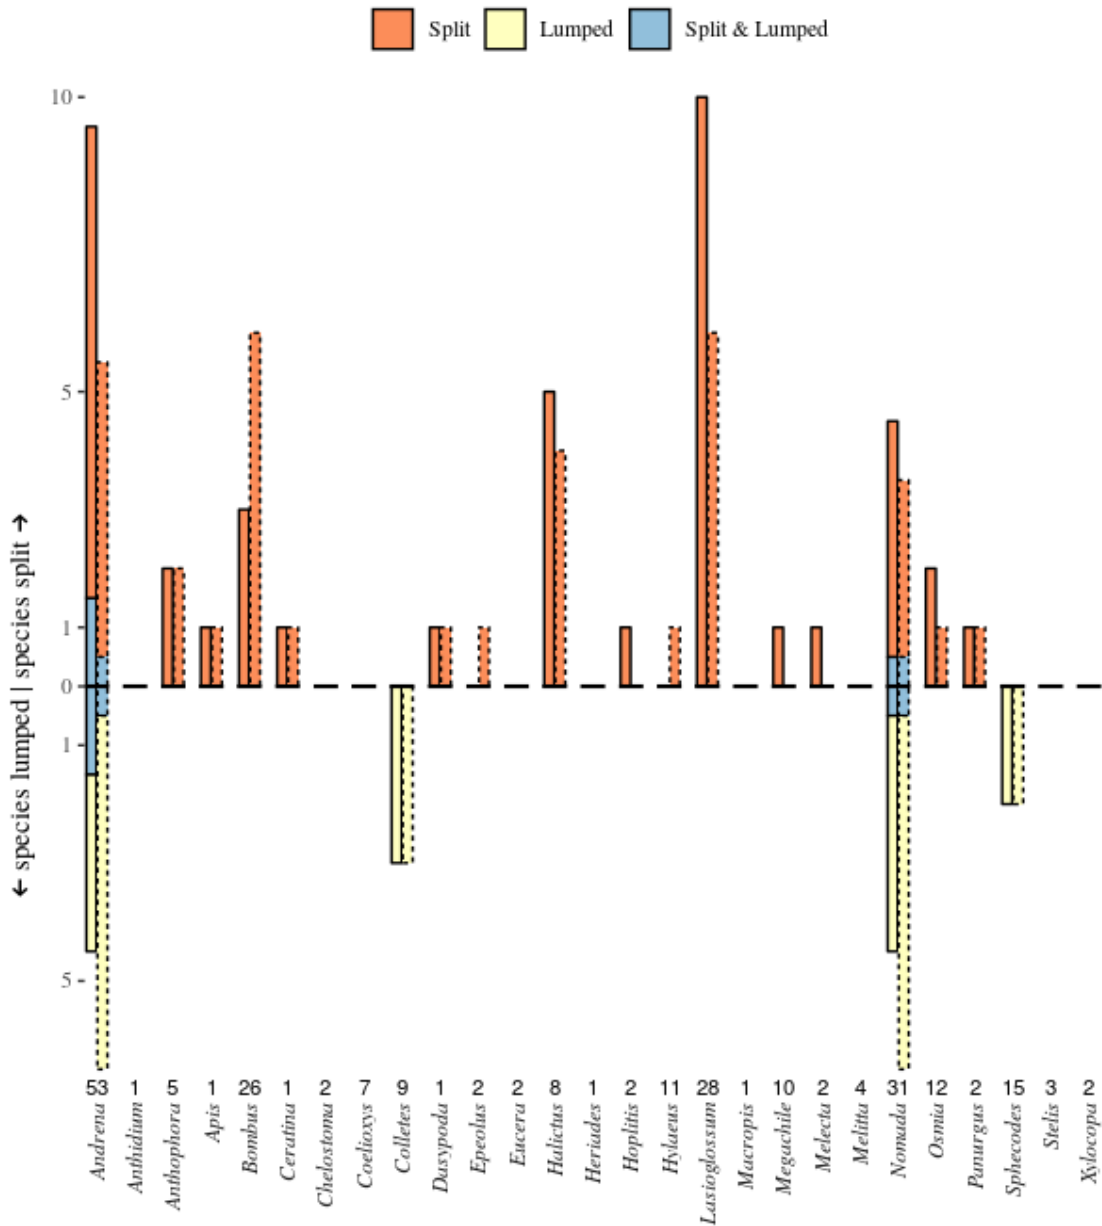

738

739 Fig. 3. Congruence of species delimitation with assignment to Linnaean species, comparing the  
 740 Generalised Mixed Yule Coalescent model (GMYC) (solid lines) and BOLD BIN assignments (stipled  
 741 lines). Each genus is assessed separately. The number of incongruent clusters are shown, either  
 742 splitting the morphospecies (orange), lump the morphospecies (yellow), or both split the  
 743 morphospecies and lump those sequences with other morphospecies (blue). The total number of  
 744 species in each genus is given above the genus name. Note that for many genera the morphospecies  
 745 assignments were perfectly congruent with either DNA-based methods (no bars).

746

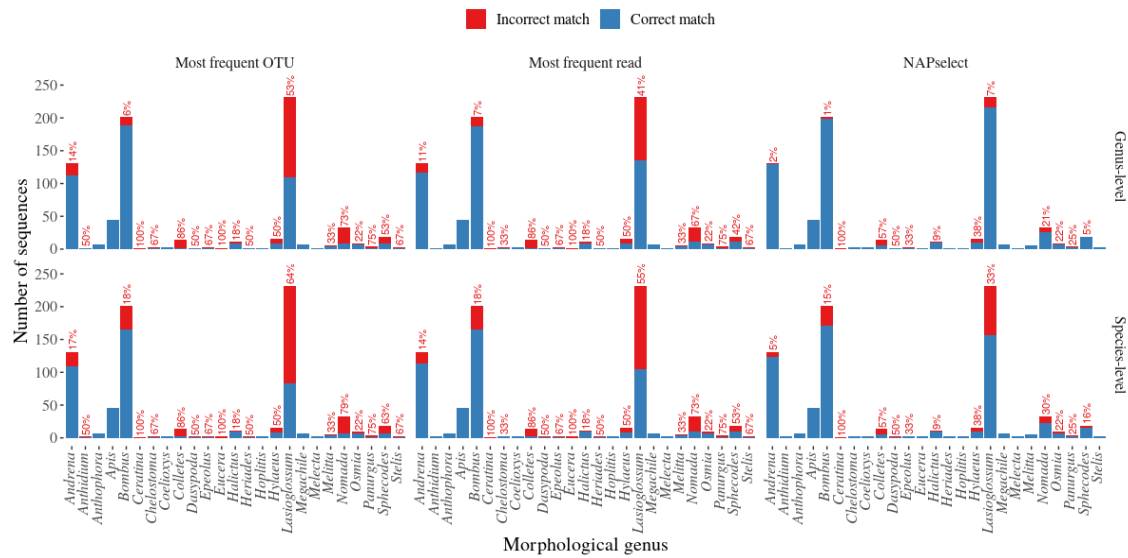

747

748

749

750 Figure 4: The proportion of molecular identification failure for different morphological species across  
 751 genera. For each morphological species, we calculated the proportion of specimens for which the  
 752 designated barcode failed to be correctly identified using the reference database. These values are  
 753 presented here, grouped by genus and the three different barcode designation methods. Values  
 754 along the x-axis show the number of morphological species in the genus, and the total number of  
 755 specimens.

756

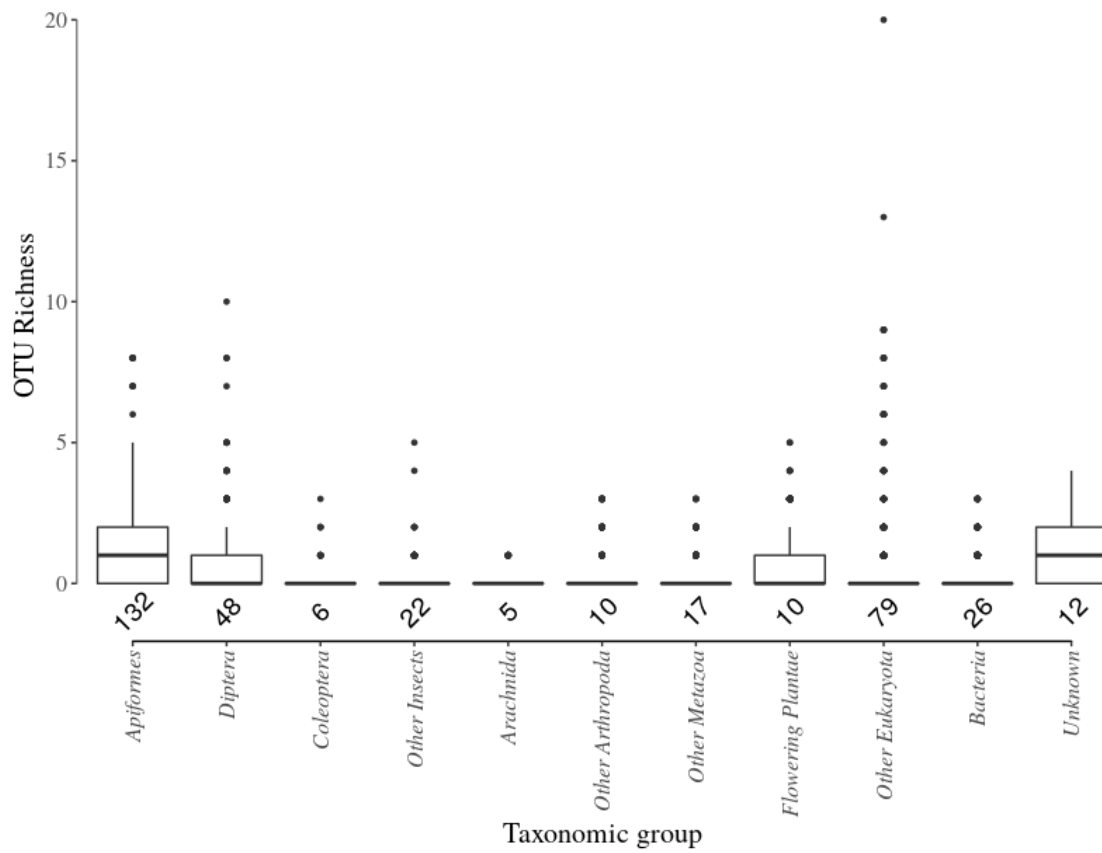

757

758

759 Figure 5: The taxonomic composition of secondary OTUs in NGS barcoding of bees. Boxplot shows  
760 the average number of secondary OTUs within major taxonomic groups found in each sample. Values  
761 below boxes give the total number of OTUs for that taxon found across the dataset.

762

763

764

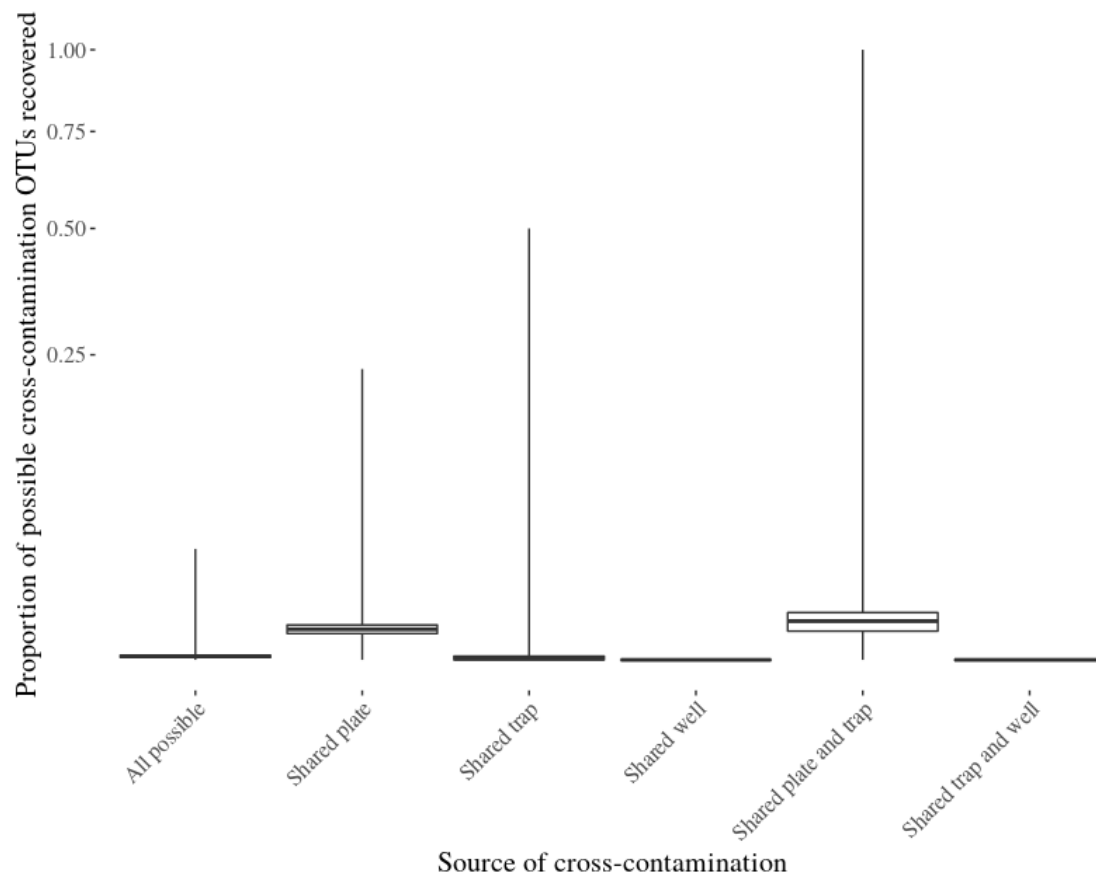

765

766

767

768 Figure 6: Boxplot showing the rate of recovery of all possible cross-contamination OTUs from  
769 different sources of cross contamination. The rate of shared OTU recovery is significantly higher  
770 when considering samples from the same plate and same plate and trap compared with a  
771 background rate of cross contamination (all possible).
